# Supplementary material for: HEV ORF3 downregulates TLR7 to inhibit the generation of type I interferon via impairment of multiple signaling pathways
Source: PubMed Central journal article supplement (PMC5988675; doi:10.1038/s41598-018-26975-4), 2018-06-05

**HEV ORF3 downregulates TLR7 to inhibit the generation of type I interferon  
via impairment of multiple signaling pathways**

Qingsong Lei<sup>a</sup>, Lin Li<sup>b</sup>, Shujun Zhang<sup>a</sup>, Tianju Li<sup>a</sup>, Xiaomei Zhang<sup>a</sup>, Xiaolin Ding<sup>a</sup>,

Bo Qin<sup>a, \*</sup>

# 武汉普诺赛生命科技有限公司

## Procell Life Science&Technology Co.,Ltd.

附表 1: 细胞株 THP-1 的 STR 位点和 Amelogenin 位点的基因分型结果

Schedule 1. Genotyping results of STR loci and Amelogenin loci of THP-1 cell line.

| 细胞 THP-1 (图片编号为 PC74) |          |          |
|-----------------------|----------|----------|
| Marker                | Allele 1 | Allele 2 |
| D3S1358               | 15       | 17       |
| <b>THO1</b>           | 8        | 9.3      |
| D21S11                | 30       | 31.2     |
| D18S51                | 13       | 14       |
| Penta E               | 11       | 15       |
| <b>D5S818</b>         | 11       | 12       |
| <b>D13S317</b>        | 13       | 13       |
| <b>D7S820</b>         | 10       | 10       |
| <b>D16S539</b>        | 11       | 12       |
| <b>CSF1PO</b>         | 11       | 13       |
| Penta D               | 10       | 12       |
| <b>AMEL</b>           | X        | Y        |
| <b>vWA</b>            | 16       | 16       |
| D8S1179               | 10       | 14       |
| <b>TPOX</b>           | 8        | 11       |
| FGA                   | 24       | 25       |
| D6S1043               | 14       | 14       |
| D2S1338               | 17       | 18       |
| D12S391               | 19       | 19       |
| D19S433               | 12.2     | 13       |
| D1S1656               | 16       | 17       |

附图 1: ATCC 官网 THP-1 细胞 STR 位点信息

### THP-1 (ATCC® TIB-202™)

Organism *Homo sapiens, human* / Cell Type: **monocyte** / Tissue: **peripheral blo**

| GENERAL INFORMATION | CHARACTERISTICS | CULTURE METHOD                                                                                                                           | SPECIFICATIONS |
|---------------------|-----------------|------------------------------------------------------------------------------------------------------------------------------------------|----------------|
| STR Profile         |                 | Amelogenin: X,Y<br>CSF1PO: 11,13<br>D13S317: 13<br>D16S539: 11,12<br>D5S818: 11,12<br>D7S820: 10<br>THO1: 8,9.3<br>TPOX: 8,11<br>vWA: 16 |                |

网站: [www.procell.com.cn](http://www.procell.com.cn)  
 电话: 400-650-3656  
 邮箱: [sales@procell.com.cn](mailto:sales@procell.com.cn)

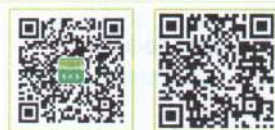

# 武汉普诺赛生命科技有限公司

## Procell Life Science & Technology Co., Ltd.

附图 2: THP-1 细胞 STR 位点和 Amelogenin 位点的基因分型结果  
Schedule 2. GeneMapper of STR loci and Amelogenin loci of THP-1 cell line.

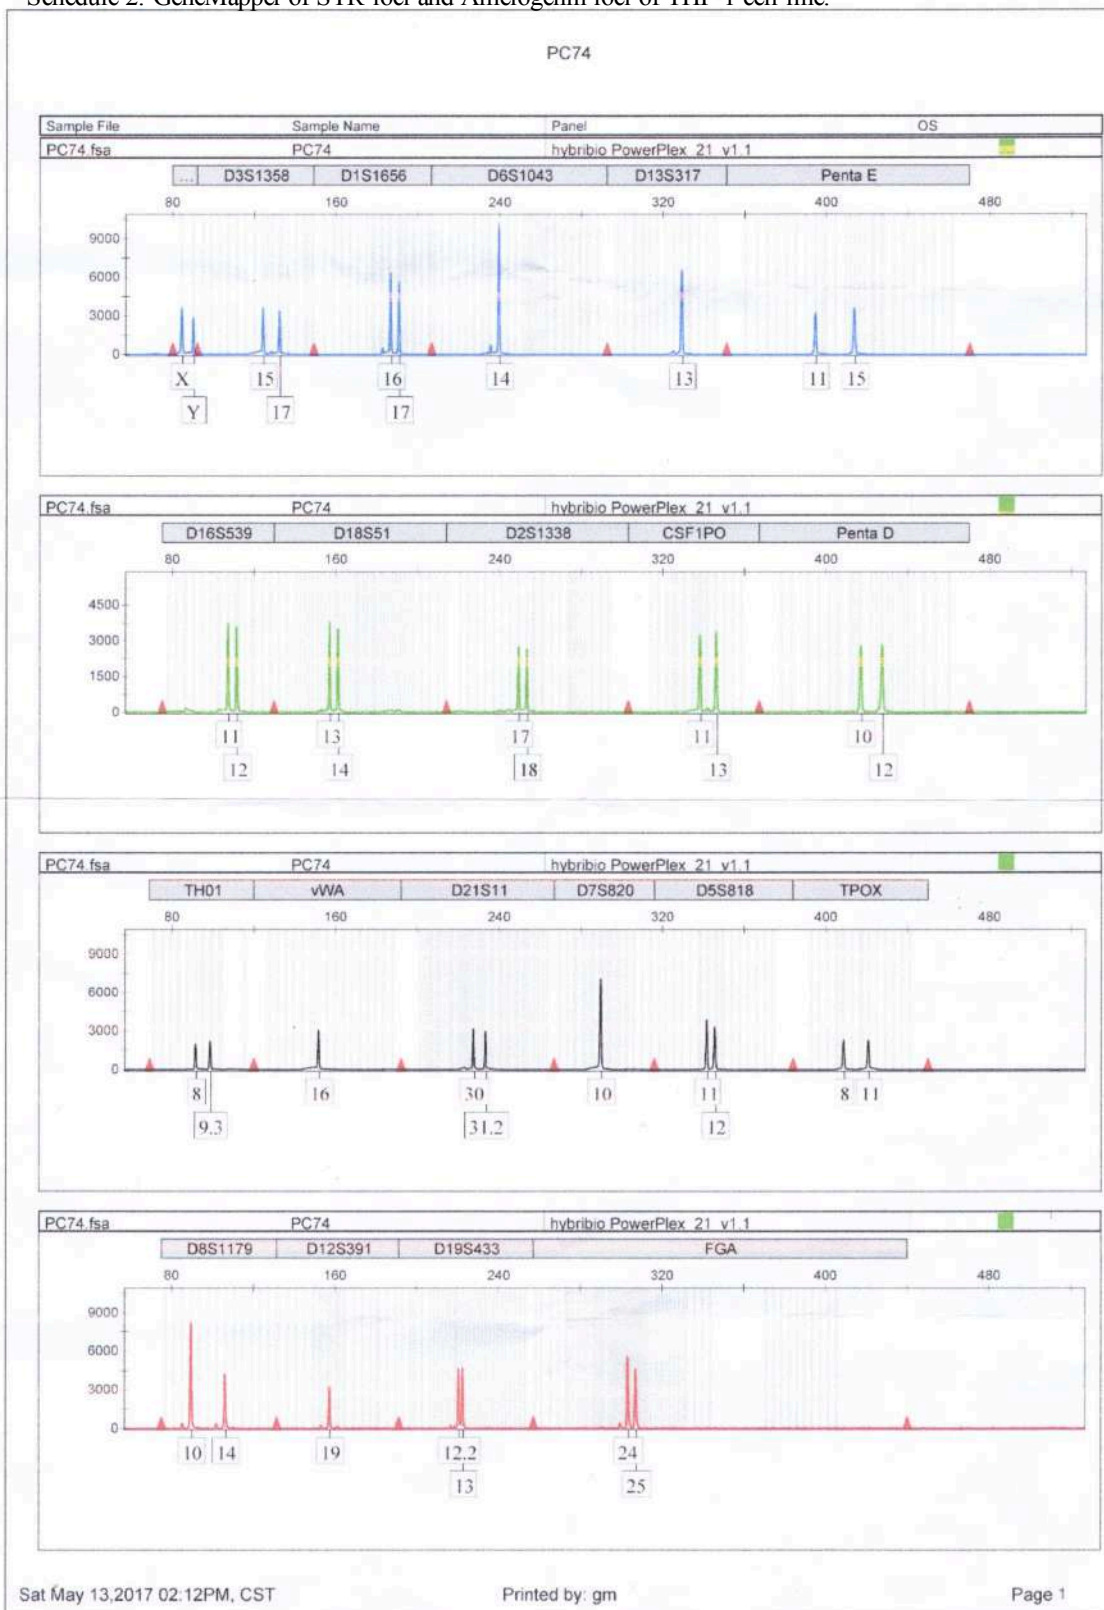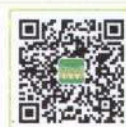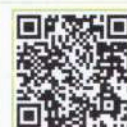

Supplement: 41598_2018_26975_MOESM1_ESM.pdf [file 41598_2018_26975_MOESM1_ESM.pdf]
